# Supplementary material
Source: PubMed Central journal article supplement (PMC5572750)
Supplement: NIHMS897688-supplement-Supplementary_File.pdf [file NIHMS897688-supplement-Supplementary_File.pdf]

## Supporting Information (SI)

### **Insights into the structure and molecular mechanisms of the ligand-estrogen receptor $\alpha$ complex with bisphenol A and two analogues**

Yin Li<sup>a</sup>, Lalith Perera<sup>b</sup>, Laurel A. Coons<sup>a</sup>, Katherine A. Burns<sup>a</sup>, J. Tyler Ramsey<sup>a</sup>, Christine T. Teng<sup>c</sup>, Katherine E. Pelch<sup>c</sup>, René Houtman<sup>d</sup>, Rinie van Beuningen<sup>d</sup>, and Kenneth S. Korach<sup>a,1</sup>

<sup>a</sup>Reproductive and Developmental Biology Laboratory, <sup>b</sup>Genome Integrity and Structural Biology Laboratory, and <sup>c</sup>National Toxicology Program Laboratory, National Institute of Environmental Health Sciences, National Institutes of Health, Research Triangle Park, NC 27709, <sup>d</sup>PamGene International B.V., Wolvenhoek 10, NL-5211 HH 's-Hertogenboch, The Netherlands

<sup>1</sup>To whom correspondence should address: Email: [Korach@niehs.nih.gov](mailto:Korach@niehs.nih.gov)

## Materials and Methods

**Chemicals.** 17 $\beta$ -Estradiol (E2) was purchased from Sigma-Aldrich and ICI 182,780 (ICI) was purchased from Tocris Bioscience. Bisphenol A (BPA), bisphenol AF (BPAF), and bisphenol S (BPS) used in this study were provided by the Midwest Research Institute via a contract with the National Toxicology Program (NTP). All 10 mM stock solutions were made in DMSO and kept in -20 °C.

**Plasmids.** The expression vectors pcDNA3 was purchased from Invitrogen. An internal control plasmid for transfection efficiency, pRL-TK renilla luciferase (pRL-TK Luc), was purchased from Promega. The luciferase reporter plasmid, 3xERE Luc (synthetic vitellogenin ERE-TATA fused to a luciferase reporter gene) and full-length human ER $\alpha$  expression plasmid, pcDNA/hER $\alpha$ , have been described previously ([39](#)). The following plasmids were gifts from Dr. D. McDonnell (Duke University): pcDNA/SRC-1, -2, -3, and pcDNA/PGC1 $\alpha$ ,  $\beta$ .

**Cell lines and tissue culture.** Ishikawa/vec and Ishikawa/ER $\alpha$  cells were maintained in phenol red-free DMEM:F12 medium (Invitrogen) supplemented with 10% FBS and 1 mg/mL Geneticin (G418; Invitrogen). HepG2 cells were maintained in phenol red-free Minimum Essential Medium (MEM; Invitrogen) supplemented with 10% Fetal Bovine Serum (FBS; Gemini Bio- Products) and 4 mM L-glutamine (Invitrogen). MCF-7 and BG-1 FR cells were maintained in phenol-red free DMEM:F12 medium (Invitrogen) supplemented with 10% FBS and 4 mM L-glutamine. Recombinant U2OS/ER $\alpha$  cells were maintained in phenol red-free Dulbecco's modified essential medium (DMEM; Invitrogen) supplemented with 10% FBS and 4 mM L-glutamine. For cell-starving conditions, 5 or 10% Charcoal/Dextran stripped FBS (sFBS; Gemini Bio-Products) was substituted for FBS in the medium.

### **Transient transfection and luciferase reporter analysis.**

For ER-negative HepG2 cells, a total of 0.5 µg of DNA, including 0.2 µg of ER $\alpha$  or ER $\beta$ , 0.2 µg of 3xERE Luc and 0.1 µg of pRL-TK Luc plasmids were transfected into the cells. For Ishikawa/vec, Ishikawa/ER $\alpha$  stable cells, and ER-positive cells (MCF-7 and BG-1 FR), a total of 0.3 µg of DNA, including 0.2 µg of 3xERE Luc and 0.1 µg of pRL-TK Luc plasmids were transfected. After 8 hours, cells were changed to fresh 10% sFBS medium overnight and then treated with vehicle control (DMSO, final concentration <0.01%), E2, or BPAs (1, 10, 100 and 1000 nM).

For coregulator experiments in HepG2 cells, a total of 0.8 µg of DNA, including 0.1 µg of ER $\alpha$ , 0.4 µg of either SRC-1, SRC-2, SRC-3, PGC1 $\alpha$ , or PGC1 $\beta$ , 0.2 µg of 3xERE Luc, and 0.1 µg of pRL-TK plasmids were transfected into the cells. After 8 hours, cells were changed to fresh 10% sFBS medium overnight and then treated with vehicle control (DMSO, final concentration <0.01%), E2 (10 nM), or BPAs (100 and 1000 nM) for 18 hours.

Luciferase assays were performed using the Dual Luciferase Reporter Activity System (Promega).

Transfection efficiency was normalized against the renilla luciferase. Fold changes were calculated relative to vehicle controls. All experiments were repeated at least three times. Data shown are the average of triplicate determinations in a representative experiment. Values were calculated relative to vehicle control and presented as  $\pm$  standard error of the mean (SEM).

**RNA extraction and qPCR analysis.** Total RNA was extracted using RNeasy Mini Kit (Qiagen). First-strand cDNA synthesis was performed using Superscript reverse transcriptase according to the manufacturer's protocol (Invitrogen). The mRNA levels were measured using SYBR green assays (Applied Biosystems). The sequences of primers used in qPCR and ChIP qPCR are shown in the table below. Cycle threshold (Ct) values were obtained using the ABI PRISM 7900 Sequence Detection System and analysis software (Applied Biosystems). Each sample was normalized against  $\beta$ -actin expression. Experiments were repeated three times and results are presented as mean  $\pm$  SEM. Changes of endogenous gene expression by E2 were calculated as fold change relative to the vehicle control group in each cell line.

**qPCR primers**

| <b>Gene symbol and GenBank accession number</b> | <b>Sequence (5' – 3')</b>                              |
|-------------------------------------------------|--------------------------------------------------------|
| Human <i>WISP2/CNN5</i><br>(NM_003881)          | F: TGAGCGGCACACCGAAGAC<br>R: ACAGCCATCCAGCACCAG        |
| Human <i>PGR</i><br>(NM_000926.4)               | F: GACGTGGAGGGCGCATAT<br>R: GCAGTCCGCTGTCCTTTCT        |
| Human <i>GREB1</i><br>(NM_014668)               | F: CAAAGAATAACCTGTTGGCCC<br>R: GACATGCCTGCGCTCTCATAC   |
| Human $\beta$ - <i>actin</i><br>(NM_001101)     | F: GACAGGATGCAGAAGGAGATCAC<br>R: GCTGATCCACATCTGCTGGAA |
| Human <i>FOLR2</i><br>(NM_000803)               | F: CCTCTGGAGTCACTCATACAAGG<br>R: CCTGGGCTGAATCAAACCAC  |
| Human <i>FN3K</i><br>(NM_022158)                | F: TTCATCCCGCAGGTGAATGAG<br>R: TGCCTCTCGGTGAGCATAGT    |
| Human <i>KRT20</i><br>(NM_019010)               | F: GGACGACACCCAGCGTTTAT<br>R: CGCTCCCATAGTTCACCGTG     |

**Table S1A. 74 peptides that positively interact with the E2/ER $\alpha$  complex derived from 32 coregulators**

| 74 peptides              | Relative binding value | 32 coregulator descriptions                                           |
|--------------------------|------------------------|-----------------------------------------------------------------------|
| BL1S1_1_11               | 5.8                    | BLOC-1: biogenesis of lysosome-related organelles complex-1 subunit 1 |
| BRD8_254_276             | 34.3                   | TrCP120: Thyroid hormone receptor coactivating protein 120kDa         |
| CBP_2055_2077            | 1.3                    | CBP: CREB-binding protein                                             |
| CBP_57_80                | 24.4                   |                                                                       |
| CENPR_1_18               | 1.5                    | CENP-R: Centromere protein R                                          |
| EP300_69_91              | 16.5                   | P300: Histone acetyltransferase p300/E1A-associated protein p300      |
| GNAQ_21_43               | 5.4                    | G $\alpha$ q : Guanine nucleotide-binding protein alpha-q             |
| HAIR_745_767_C755S/C759S | 18.3                   | H: Protein hairless                                                   |
| IKBB_277_299             | 3.1                    | NF $\kappa$ B: NF-kappa-B inhibitor beta                              |
| ILK_131_153              | 4.5                    | ILK-1/p59ILK: Integrin-liked protein kinase                           |
| JHD2C_2054_2076          | 19.0                   | TRIP-8: thyroid receptor-interacting protein 8                        |
| LCOR_40_62               | 34.5                   | LCoR: ligand-dependent corepressor                                    |
| MED1_591_614             | 11.2                   | TRIP-2: thyroid receptor-interacting protein 2                        |
| MED1_632_655             | 21.1                   |                                                                       |
| MLL2_4175_4197           | 2.7                    | MLL2/KMT2B: Myeloid/lymphoid or mixed-lineage leukemia protein 2      |
| MLL2_4702_4724           | 3.0                    |                                                                       |
| NCOA1_1421_1441          | 5.6                    | SRC-1/RIP160: nuclear receptor co-activator 1                         |
| NCOA1_620_643            | 45.1                   |                                                                       |
| NCOA1_677_700            | 5.5                    |                                                                       |
| NCOA1_737_759            | 47.5                   |                                                                       |
| NCOA2_628_651            | 12.8                   | SRC-2/NCoA-2: nuclear receptor co-activator 2                         |
| NCOA2_677_700            | 9.7                    |                                                                       |
| NCOA2_733_755            | 8.6                    |                                                                       |
| NCOA3_104_123_N-KKK      | 2.5                    | SRC-3/NCoA-3: nuclear receptor co-activator 3                         |
| NCOA3_609_631            | 21.1                   |                                                                       |
| NCOA3_609_631_C627S      | 13.1                   |                                                                       |
| NCOA3_673_695            | 5.8                    |                                                                       |
| NCOA3_725_747            | 6.3                    |                                                                       |
| NCOA6_875_897            | 7.6                    | NCoA-6: nuclear receptor co-activator 6                               |
| NCOR1_2376_2398          | 2.8                    | N-CoR1: Nuclear receptor corepressor 1                                |
| NELFB_428_450            | 2.2                    | NELF-B: Negative elongation factor B                                  |
| NELFB_80_102             | 4.9                    |                                                                       |
| NROB1_1_23               | 7.3                    | DAX-1: nuclear receptor subfamily group B member 1                    |
| NROB1_136_159            | 3.9                    |                                                                       |
| NROB1_68_90_C69S         | 6.8                    |                                                                       |
| NROB2_106_128            | 12.2                   | SHP: small heterodimer partner/nuclear receptor subfamily member 2    |
| NROB2_201_223_C207S      | 11.1                   |                                                                       |
| NROB2_9_31_C9S/C11S      | 3.4                    |                                                                       |
| NRBF2_128_150            | 10.4                   | NRBF-2: Nuclear receptor subfamily 0 group B member 2                 |

**Table S1A. Continued**

| <b>74 peptides</b>       | <b>Relative binding value</b> | <b>32 coregulator descriptions</b>                          |
|--------------------------|-------------------------------|-------------------------------------------------------------|
| NRIP1_1055_1077          | 6.7                           | RIP140: receptor-interacting protein 1                      |
| NRIP1_120_142            | 15.3                          |                                                             |
| NRIP1_121_143_P124R      | 7.3                           |                                                             |
| NRIP1_173_195            | 6.6                           |                                                             |
| NRIP1_173_195_C177S      | 4.0                           |                                                             |
| NRIP1_253_275_C263S      | 21.3                          |                                                             |
| NRIP1_368_390            | 5.1                           |                                                             |
| NRIP1_488_510            | 8.1                           |                                                             |
| NRIP1_700_722            | 4.4                           |                                                             |
| NRIP1_701_723            | 4.4                           |                                                             |
| NRIP1_805_831            | 4.3                           |                                                             |
| NRIP1_924_946            | 3.2                           |                                                             |
| NRIP1_924_946_C945S      | 4.5                           |                                                             |
| NSD1_894_916             | 7.4                           | NSDP1: NR-binding SET domain-containing protein             |
| PELP1_168_190            | 1.2                           | PELP1: Proline-, glutamic acid-, and leucine-rich protein 1 |
| PELP1_20_42              | 2.0                           |                                                             |
| PELP1_446_468            | 9.5                           |                                                             |
| PNRC1_306_327            | 1.7                           | PNRC1/B4-2: Proline-rich nuclear receptor coactivator 1     |
| PPRC1_151_173            | 6.3                           | PRC: PGC-1 related coactivator                              |
| PR285_1105_1127          | 6.1                           | PDIP1: PPAR-gamma DBD-interacting protein 1                 |
| PRGC1_130_155            | 5.8                           | PGC1 $\alpha$ : PPAR-g co-activator 1-alpha                 |
| PRGC1_134_154            | 5.2                           |                                                             |
| PRGC2_146_166            | 7.1                           | PGC1 $\beta$ : PPAR-g co-activator 1-alpha                  |
| PRGC2_338_358            | 6.0                           |                                                             |
| PROX1_57_79              | 12.7                          | PROX1: homeobox prospero-like protein                       |
| RBL2_875_897_C879S/C894S | 1.4                           |                                                             |
| TIF1A_747_769            | 4.6                           |                                                             |
| TIP60_476_498            | 12.1                          | Tip60: 60 kDa Tat interactive protein                       |
| TREF1_168_190            | 43.7                          | TReP132: Transcriptional –regulating factor 1               |
| TRXR1_132_154            | 13.1                          | TR: Thioredoxinreductase TR1                                |
| UBE3A_649_671            | 2.8                           | E6-AP: E6AP ubiquitin protein ligase                        |
| WIPI1_119_141            | 19.2                          | WIPI-1: WD repeat phosphoinositide-interacting protein 1    |
| WIPI1_313_335_C318S      | 6.1                           |                                                             |
| ZNH13_89_111             | 5.5                           | TRIP-3: Thyroid receptor interacting protein 3              |
| ZNT9_449_471             | 2.1                           | ZnT-9/HUEL: Zinc transporter 9/Humanembryonic lung protein  |

**Table S1B. 8 peptides that positively interact with the BPA/ER $\alpha$  complex derived from 7 coregulators**

| 8 peptides      | Relative binding value | 7 coregulator descriptions                                         |
|-----------------|------------------------|--------------------------------------------------------------------|
| NCOA1_620_643   | 2.0                    | SRC-1/RIP160: nuclear receptor co-activator 1                      |
| NCOA1_737_759   | 2.5                    |                                                                    |
| NCOA2_628_651   | 1.3                    | SRC-2/RIP160: nuclear receptor co-activator 1                      |
| NCOA6_875_897   | 1.5                    | NCoA-6/RAP250: nuclear receptor co-activator 6                     |
| NROB2_106_128   | 1.1                    | SHP: small heterodimer partner/nuclear receptor subfamily member 2 |
| NRIP1_1055_1077 | 1.1                    | RIP140: receptor-interacting protein 1                             |
| PELP1_446_468   | 1.7                    | PELP1: Proline-, glutamic acid-, and leucine-rich protein 1        |
| PRGC1_134_154   | 1.1                    | PGC1 $\alpha$ : PPAR-g co-activator 1-alpha                        |

**Table S1C. 9 peptides that positively interact with the BPAF/ER $\alpha$  complex derived from 9 coregulators**

| 9 peptides          | Relative binding value | 9 coregulator descriptions                                  |
|---------------------|------------------------|-------------------------------------------------------------|
| KIF11_832_854_C854S | 1.9                    | KIF11: kinesin-like protein KIF11                           |
| MAPE_356_378        | 1.9                    | MAPE: melanoma antigen preferentially express protein       |
| NCOA3_104_123_N-KKK | 1.5                    | SRC-3/NCoA-2: nuclear receptor co-activator 3               |
| PELP1_446_468       | 1.7                    | PELP1: Proline-, glutamic acid-, and leucine-rich protein 1 |
| PPRC1_1159_1181     | 1.5                    | PRC: PGC-related coactivator                                |
| PRDM2_948_970       | 1.6                    | PRDP2/MTB-ZF: PR domain-containing protein 2                |
| PRGR_102_124        | 3.4                    | PR: progesterone receptor                                   |
| TF65_437_459        | 2.2                    | TF65: transcription factor p65                              |
| ZNT9_449_471        | 1.5                    | ZnT-9/HUEL: zinc transporter 9                              |

**Table S1D. 25 peptides that positively interact with the BPS/ER $\alpha$  complex derived from 14 coregulators**

| 25 peptides         | Relative binding value | 14 coregulator descriptions                                        |
|---------------------|------------------------|--------------------------------------------------------------------|
| JHD2C_2054_2076     | 1.5                    | TRIP-8: thyroid receptor-interacting protein 8                     |
| LCOR_40_62          | 3.1                    | LCoR: ligand-dependent corepressor                                 |
| MED1_591_614        | 1.9                    | TRIP-2: thyroid receptor-interacting protein 2                     |
| NCOA1_1421_1441     | 1.3                    | SRC-1/RIP160: nuclear receptor co-activator 1                      |
| NCOA1_620_643       | 3.6                    |                                                                    |
| NCOA1_677_700       | 1.6                    |                                                                    |
| NCOA2_628_651       | 1.9                    | SRC-2/NCoA-2: nuclear receptor co-activator 2                      |
| NCOA2_677_700       | 1.7                    |                                                                    |
| NCOA2_733_755       | 1.4                    |                                                                    |
| NCOA3_609_631       | 2.4                    | SRC-3/NCoA-3: nuclear receptor co-activator 3                      |
| NCOA3_609_631_C627S | 1.7                    |                                                                    |
| NCOA3_725_747       | 1.2                    |                                                                    |
| NROB1_1_23          | 1.6                    | DAX-1: nuclear receptor subfamily group B member 1                 |
| NROB1_136_159       | 1.2                    |                                                                    |
| NROB1_68_90_C69S    | 1.6                    |                                                                    |
| NROB2_106_128       | 2.1                    | SHP: small heterodimer partner/nuclear receptor subfamily member 2 |
| NRIP1_1055_1077     | 1.9                    | RIP140: receptor-interacting protein 1                             |
| NRIP1_120_142       | 1.6                    |                                                                    |
| NRIP1_253_275_C263S | 1.9                    |                                                                    |
| NSD1_894_916        | 1.2                    | NSDP1: NR-binding SET domain-containing protein                    |
| PELP1_446_468       | 1.6                    | PELP1: Proline-, glutamic acid-, and leucine-rich protein 1        |
| PRGC1_130_155       | 1.9                    | PGC1 $\alpha$ : PPAR-g co-activator 1-alpha                        |
| PRGC1_134_154       | 1.5                    |                                                                    |
| PRGC2_146_166       | 1.5                    | PGC1 $\beta$ : PPAR-g co-activator 1-beta                          |
| TIP60_476_498       | 1.4                    | Tip60: 60 kDa Tat interactive protein                              |



**Table S2A. 35 peptides that negatively interact with the E2/ER $\alpha$  complex derived from 22 coregulators**

| 35 peptides               | Relative binding value | 22 coregulator descriptions                                        |
|---------------------------|------------------------|--------------------------------------------------------------------|
| ANDR_10_32                | 0.6                    | AR: Androgen receptor                                              |
| CENPR_159_177             | 0.4                    | CENP-R: Nuclear receptor-interaction factor 3                      |
| CHD9_1023_1045            | 0.4                    | CHD9: PPAR-alpha-interacting complex protein 320 kDa               |
| CHD9_855_877              | 0.4                    |                                                                    |
| CNOT1_140_162             | 0.2                    | NOT1H: Negative regulator of transcription subunit 1 homolog       |
| CNOT1_1626_1648           | 0.3                    |                                                                    |
| CNOT1_1929_1951_C1932S    | 0.3                    |                                                                    |
| CNOT1_557_579             | 0.3                    |                                                                    |
| DHX30_49_70               | 0.4                    | DHX30: DEAH box protein 30                                         |
| GELS_376_398              | 0.7                    | ADF: Actin-depolymerizing factor                                   |
| HAIR_553_575_C567S        | 0.4                    | H: Hairless                                                        |
| MAPE_249_271              | 0.7                    | OIP4: OPA-interacting protein 4                                    |
| MAPE_300_322              | 0.3                    |                                                                    |
| MAPE_454_476_C472S        | 0.2                    |                                                                    |
| MAPE_91_113               | 0.2                    |                                                                    |
| MEN1_255_277              | 0.6                    | MEN1: Menin                                                        |
| MGMT_86_108               | 0.4                    | MGMT: Methylated-DNA-protein-cysteine methyltransferase            |
| MTA1S_388_410_C393S/C396S | 0.7                    | MTA1: Metastasis-associated protein                                |
| NCOR1_2039_2061           | 0.2                    | N-CoR1: Nuclear receptor coresspressor 1                           |
| NCOR1_2039_2061_C2056S    | 0.2                    |                                                                    |
| NCOR1_2251_2273           | 0.3                    |                                                                    |
| NCOR2_2123_2145           | 0.5                    | N-CoR2/SMRT: Nuclear receptor coresspressor 2                      |
| NCOR2_2330_2352           | 0.3                    |                                                                    |
| NCOR2_649_671_C649S       | 0.6                    |                                                                    |
| NELFB_328_350             | 0.5                    | NELF-B: Negative elongation factor B                               |
| NROB2_237_257             | 0.3                    | SHP: small heterodimer partner/nuclear receptor subfamily member 2 |
| PAK6_248_270              | 0.7                    | PAK-6: Serine/threonine-protein kinase p21-activated kinase 6      |
| PCAF_178_200              | 0.2                    | PCAF: P300/CBP-associated factor                                   |
| PELP1_142_164             | 0.3                    | PELP1: Proline-, glutamic acid-, and leucine-rich protein 1        |
| PELP1_258_280             | 0.4                    |                                                                    |
| PR285_2216_2238_C2219S    | 0.6                    | PDIP1: PPAR-gamma DBD-interacting protein 1                        |
| TGFI1_325_347_C334S/C346S | 0.5                    | TGFI1: Transforming growth factor beta-1-induced transcript 1      |
| TGFI1_443_461_C452S/C455S | 0.4                    |                                                                    |
| TIF1A_373_395_C394S       | 0.5                    | TIF1-a: Transcription intermediary factor 1-alpha                  |
| TREF1_850_872             | 0.5                    | TREF1: Transcriptional-regulating factor 1                         |

**Table S2B. 44 peptides that negatively interact with the BPA/ER $\alpha$  complex derived from 28 coregulators**

| 44 peptides               | Relative binding value | 28 coregulator descriptions                                           |
|---------------------------|------------------------|-----------------------------------------------------------------------|
| ANDR_10_32                | 0.8                    | AR: Androgen receptor                                                 |
| BL1S1_1_11                | 0.8                    | BLOC-1: biogenesis of lysosome-related organelles complex-1 subunit 1 |
| CBP_345_368_C367S         | 0.6                    | CBP: CREB-binding protein                                             |
| CENPR_159_177             | 0.3                    | CENP-R: Centromere protein R                                          |
| CNOT1_1626_1648           | 0.2                    | NOT1H: Negative regulator of transcription subunit 1 homolog          |
| CNOT1_1929_1951_C1932S    | 0.3                    |                                                                       |
| CNOT1_557_579             | 0.4                    |                                                                       |
| DHX30_49_70               | 0.5                    | DHX30: DEAH box protein 30                                            |
| GELS_376_398              | 0.5                    | ADF: Actin-depolymerizing factor                                      |
| GNAQ_21_43                | 0.7                    | Gaq : Guanine nucleotide-binding protein alpha-q                      |
| HAIR_553_575_C567S        | 0.4                    | H: Hairless                                                           |
| IKBB_277_299              | 0.7                    | NFkB:NF-kappa-B inhibitor beta                                        |
| MAPE_249_271              | 0.6                    | OIP4: OPA-interacting protein 4                                       |
| MAPE_300_322              | 0.8                    |                                                                       |
| MAPE_454_476_C472S        | 0.3                    |                                                                       |
| MGMT_86_108               | 0.5                    | MGMT: Methylated-DNA-protein-cysteine methyltransferase               |
| MTA1S_388_410_C393S/C396S | 0.3                    | MTA1: Metastasis-associated protein                                   |
| NCOR1_1925_1946           | 0.6                    | N-CoR1: Nuclear receptor coresspressor 1                              |
| NCOR1_2039_2061           | 0.5                    |                                                                       |
| NCOR1_2039_2061_C2056S    | 0.5                    |                                                                       |
| NCOR1_2251_2273           | 0.3                    |                                                                       |
| NCOR2_2123_2145           | 0.5                    | N-CoR2/SMRT: Nuclear receptor coresspressor 2                         |
| NCOR2_2330_2352           | 0.2                    |                                                                       |
| NR0B2_9_31_C9S/C11S       | 0.6                    | SHP: small heterodimer partner/nuclear receptor subfamily member 2    |
| NRIP1_700_722             | 0.8                    | RIP140: receptor-interacting protein 1                                |
| NRIP1_701_723             | 0.8                    |                                                                       |
| NRIP1_924_946             | 0.7                    |                                                                       |
| NSD1_894_916              | 0.6                    | NSDP1: NR-binding SET domain-containing protein                       |
| PCAF_178_200              | 0.3                    | PCAF: P300/CBP-associated factor                                      |
| PELP1_142_164             | 0.3                    | PELP1: Proline-, glutamic acid-, and leucine-rich protein 1           |
| PELP1_168_190             | 0.6                    |                                                                       |
| PELP1_258_280             | 0.4                    |                                                                       |
| PELP1_496_518_C496S       | 0.5                    |                                                                       |
| PELP1_56_78_C71S          | 0.6                    |                                                                       |
| PPRC1_1159_1181           | 0.6                    | PRC: PGC-related coactivator                                          |
| PR285_1062_1084           | 0.3                    | PDIP1: PPAR-gamma DBD-interacting protein 1                           |
| PR285_2216_2238_C2219S    | 0.4                    |                                                                       |
| PRDM2_948_970             | 0.6                    | PRDP2/MTB-ZF: PR domain-containing protein 2                          |
| RAD9A_348_370             | 0.4                    | hRAD9: DNA repair exonuclease rad9 homolog A                          |
| TGFI1_325_347_C334S/C346S | 0.7                    | TGFI1: Transforming growth factor beta-1-induced transcript 1         |
| TIF1A_373_395_C394S       | 0.5                    | TIF1-a: Transcription intermediary factor 1-alpha                     |
| TREF1_850_872             | 0.7                    | TREF1: Transcriptional-regulating factor 1                            |
| TRRAP_770_792             | 0.6                    |                                                                       |
| TRRAP_971_993             | 0.7                    | STAF40: Transformation/transcription domain-associated protein        |

**Table S2C. 75 peptides that negatively interact with the BPAF/ER $\alpha$  complex derived from 38 coregulators**

| 75 peptides            | Relative binding value | 38 coregulator descriptions                                           |
|------------------------|------------------------|-----------------------------------------------------------------------|
| ANDR_10_32             | 0.4                    | AR: Androgen receptor                                                 |
| BL1S1_1_11             | 0.8                    | BLOC-1: biogenesis of lysosome-related organelles complex-1 subunit 1 |
| CBP_345_367_C367S      | 0.7                    | CBP: CREB-binding protein                                             |
| CENPR_159_177          | 0.4                    | CENP-R: Centromere protein R                                          |
| CHD9_1023_1045         | 0.5                    | CHD9: PPAR-alpha-interacting complex protein 320 kDa                  |
| CNOT1_140_162          | 0.2                    | NOT1H: Negative regulator of transcription subunit 1 homolog          |
| CNOT1_1626_1648        | 0.3                    |                                                                       |
| CNOT1_1929_1951_C1932S | 0.3                    |                                                                       |
| DHX30_49_70            | 0.4                    | DHX30: DEAH box protein 30                                            |
| GNAQ_21_43             | 0.3                    | G $\alpha$ q : Guanine nucleotide-binding protein alpha-q             |
| HAIR_553_575_C567S     | 0.2                    | H: Hairless                                                           |
| IKBB_277_299           | 0.3                    | NF $\kappa$ B: NF-kappa-B inhibitor beta                              |
| MAPE_249_271           | 0.3                    | OIP4: OPA-interacting protein 4                                       |
| MAPE_300_322           | 0.4                    |                                                                       |
| MAPE_454_476_C472S     | 0.2                    |                                                                       |
| MAPE_91_113            | 0.4                    |                                                                       |
| MED1_591_614           | 0.5                    | TRIP-2: thyroid receptor-interacting protein 2                        |
| MED1_632_655           | 0.4                    |                                                                       |
| MLL2_4175_4197         | 0.4                    | MLL2/KMT2B: Myeloid/lymphoid or mixed-lineage leukemia protein 2      |
| NCOA1_1421_1441        | 0.5                    | SRC-1/RIP160: nuclear receptor co-activator 1                         |
| NCOA1_620_643          | 0.4                    |                                                                       |
| NCOA1_677_700          | 0.4                    |                                                                       |
| NCOA2_628_651          | 0.5                    | SRC-2/NCoA-2: nuclear receptor co-activator 2                         |
| NCOA2_677_700          | 0.4                    |                                                                       |
| NCOA3_609_631_C627S    | 0.3                    | SRC-3/NCoA-3: nuclear receptor co-activator 3                         |
| NCOA3_673_695          | 0.4                    |                                                                       |
| NCOR1_2039_2061        | 0.3                    | N-CoR1: Nuclear receptor co-repressor 1                               |
| NCOR1_2039_2061_C2056S | 0.4                    |                                                                       |
| NCOR1_2376_2398        | 0.5                    |                                                                       |
| NCOR1_662_684_C662S    | 0.4                    |                                                                       |
| NCOR2_2330_2352        | 0.3                    | N-CoR2/SMRT: Nuclear receptor co-repressor 2                          |
| NCOR2_649_671_C649S    | 0.5                    |                                                                       |
| NELFB_328_350          | 0.4                    | NELF-B: Negative elongation factor B                                  |
| NELFB_428_450          | 0.4                    |                                                                       |
| NROB1_1_23             | 0.5                    | DAX-1: nuclear receptor subfamily member 1                            |
| NROB1_136_159          | 0.5                    |                                                                       |
| NROB1_68_90_C69S       | 0.4                    |                                                                       |
| NROB2_106_128          | 0.4                    |                                                                       |
| NROB2_201_223_C207S    | 0.4                    | SHP: small heterodimer partner/nuclear receptor subfamily member 2    |
| NROB2_9_31_C9S/C11S    | 0.2                    |                                                                       |
| NRIP1_1055_1077        | 0.5                    | RIP140: receptor-interacting protein 1                                |
| NRIP1_120_142          | 0.3                    |                                                                       |
| NRIP1_121_143_P124R    | 0.4                    |                                                                       |
| NRIP1_253_275_C263S    | 0.5                    |                                                                       |
| NRIP1_368_390          | 0.4                    |                                                                       |
| NRIP1_488_510          | 0.3                    |                                                                       |
| NRIP1_700_722          | 0.4                    |                                                                       |
| NRIP1_701_723          | 0.4                    |                                                                       |
| NRIP1_805_831          | 0.4                    |                                                                       |
| NRIP1_924_946          | 0.4                    |                                                                       |
| NRIP1_924_946_C945S    | 0.4                    |                                                                       |
| NSD1_894_916           | 0.5                    | NSDP1: NR-binding SET domain-containing protein                       |

**Table S2C. Continued**

| <b>75 peptides</b>        | <b>Relative binding value</b> | <b>38 coregulator descriptions</b>                             |
|---------------------------|-------------------------------|----------------------------------------------------------------|
| PAK6_248_270              | 0.5                           | PAK 6: Serine/threonine –protein kinase PAK 6                  |
| PELP1_168_190             | 0.4                           | PELP1: Proline-, glutamic acid-, and leucine-rich protein 1    |
| PELP1_258_280             | 0.5                           |                                                                |
| PELP1_496_518_C496S       | 0.4                           |                                                                |
| PELP1_56_78_C71S          | 0.5                           |                                                                |
| PELP1_571_593_C575S/C581S | 0.3                           |                                                                |
| PR285_2216_2238_C2219S    | 0.2                           | PDIP1: PPAR-gamma DBD-interacting protein 1                    |
| PRGC1_130_155             | 0.5                           | PGC1 $\alpha$ : PPAR-g co-activator 1-alpha                    |
| PRGC1_134_154             | 0.5                           |                                                                |
| PRGC2_146_166             | 0.4                           |                                                                |
| PROX1_57_79               | 0.3                           | PROX1: homeobox prospero-like protein                          |
| RAD9A_348_370             | 0.4                           | hRAD9: DNA repair exonuclease rad9 homolog A                   |
| TGFI1_325_347_C334S/C346S | 0.5                           | TGFI1: Transforming growth factor beta-1-induced transcript 1  |
| TGFI1_443_461_C452S/C455S | 0.6                           |                                                                |
| TIF1A_373_395_C394S       | 0.2                           | TIF1-a: Transcription intermediary factor 1-alpha              |
| TIF1A_747_769             | 0.4                           |                                                                |
| TIP60_476_498             | 0.6                           | Tip60: 60 kDa Tat interactive protein                          |
| TREF1_850_872             | 0.7                           | TREF1: Transcriptional-regulating factor 1                     |
| TRIP4_149_171_C171S       | 0.4                           | ASC-1: Activating signal cointegrator 1                        |
| TRRAP_770_792             | 0.6                           | STAF40: Transformation/transcription domain-associated protein |
| TRRAP_971_993             | 0.5                           |                                                                |
| TRXR1_132_154             | 0.2                           | TR: Thioredoxin reductase TR1                                  |
| ZNH13_89_111              | 0.4                           | TRIP-3: Thyroid receptor interacting protein 3                 |

**Table S2D. 31 peptides that negatively interact with the BPS/ER $\alpha$  complex derived from 23 coregulators**

| <b>31 peptides</b>        | <b>Relative binding value</b> | <b>23 coregulator descriptions</b>                                    |
|---------------------------|-------------------------------|-----------------------------------------------------------------------|
| BL1S1_1_11                | 0.8                           | BLOC-1: biogenesis of lysosome-related organelles complex-1 subunit 1 |
| CBP_345_367_C367S         | 0.6                           | CBP: CREB-binding protein                                             |
| CHD9_1023_1045            | 0.6                           | CHD9: PPAR-alpha-interacting complex protein 320 kDa                  |
| CNOT1_1626_1648           | 0.4                           | NOT1H: Negative regulator of transcription subunit 1 homolog          |
| CNOT1_1929_1951_C1932S    | 0.3                           |                                                                       |
| DHX30_49_70               | 0.5                           | DHX30: DEAH box protein 30                                            |
| GELS_376_398              | 0.5                           | ADF: Actin-depolymerizing factor                                      |
| GNAQ_21_43                | 0.7                           | G $\alpha$ q : Guanine nucleotide-binding protein alpha-q             |
| HAIR_553_575_C567S        | 0.4                           | H: Hairless                                                           |
| MAPE_249_271              | 0.7                           | OIP4: OPA-interacting protein 4                                       |
| MAPE_300_322              | 0.7                           |                                                                       |
| MAPE_454_476_C472S        | 0.4                           |                                                                       |
| MAPE_91_113               | 0.3                           |                                                                       |
| MGMT_86_108               | 0.7                           | MGMT: Methylated-DNA-protein-cysteine methyltransferase               |
| NCOR1_2039_2061           | 0.6                           | N-CoR1: Nuclear receptor coresspressor 1                              |
| NCOR1_2251_2273           | 0.3                           |                                                                       |
| NCOR1_662_684_C662S       | 0.6                           |                                                                       |
| NCOR2_2330_2352           | 0.3                           | N-CoR2/SMRT: Nuclear receptor coresspressor 2                         |
| NELFB_328_350             | 0.5                           | NELF-B: Negative elongation factor B                                  |
| NRIP1_700_722             | 0.8                           | RIP140: receptor-interacting protein 1                                |
| PAK6_248_270              | 0.8                           | PAK 6: Serine/threonine –protein kinase PAK 6                         |
| PCAF_178_200              | 0.2                           | PCAF: P300/CBP-associated factor                                      |
| PELP1_142_164             | 0.4                           | PELP1: Proline-, glutamic acid-, and leucine-rich protein 1           |
| PELP1_258_280             | 0.4                           |                                                                       |
| PPRC1_1159_1181           | 0.6                           | PRC: PGC-related coactivator                                          |
| PR285_1062_1084           | 0.4                           | PDIP1: PPAR-gamma DBD-interacting protein 1                           |
| PRDM2_948_970             | 0.6                           | PRDP2/MTB-ZF: PR domain-containing protein 2                          |
| RAD9A_348_370             | 0.4                           | hRAD9: DNA repair exonuclease rad9 homolog A                          |
| TGFI1_325_347_C334S/C346S | 0.7                           | TGFI1: Transforming growth factor beta-1-induced transcript 1         |
| TGFI1_443_461_C452S/C455S | 0.6                           |                                                                       |
| TIF1A_373_395_C394S       | 0.5                           | TIF1- $\alpha$ : Transcription intermediary factor 1-alpha            |

**Table S3. Coregulator PELP1 in the ligand-ER $\alpha$  complex by MARCoNI assay**

| Peptides                  | Peptide sequences        | Motifs   | Relative binding values |     |      |     |
|---------------------------|--------------------------|----------|-------------------------|-----|------|-----|
|                           |                          |          | E2                      | BPA | BPAF | BPS |
| PELP1_20_42               | GTGGLSAVSSGPRLRLLLLLESVS | LxxLL33  | 2.0                     | -   | -    | -   |
| PELP1_56_78_C71S          | VHPPNRSAPHLPLMSLLRLHGS   | LxxLL69  | -                       | 0.6 | 0.5  | -   |
| PELP1_142_164             | QDPPATMELAVAVLRDLLRYAAQ  | LxxLL155 | 0.3                     | 0.3 | -    | 0.4 |
| PELP1_168_190             | LFRDISMNHLPGLLTSLLGLRPE  | LxxLL181 | 1.2                     | 0.6 | 0.4  | -   |
| PELP1_258_280             | ESWEQELHSLLASHTLLGALYE   | LxxLL271 | 0.4                     | 0.4 | 0.5  | 0.4 |
| PELP1_446_468             | AGMLQGGASGEALLTHLLSDISP  | LxxLL459 | 9.5                     | 1.7 | 1.7  | 1.6 |
| PELP1_496_518_C496S       | SPFFLQSLHGDGPLRLLLLPSIH  | LxxLL509 | -                       | 0.5 | 0.4  | -   |
| PELP1_571_593_C575S/C581S | TSSRSRRELYSLLLALLAPSPR   | LxxLL584 | -                       | -   | 0.3  | -   |

*Red* (relative binding value >1) shows positive interaction; *Blue* (relative binding value <1) shows negative interaction

Figure S1

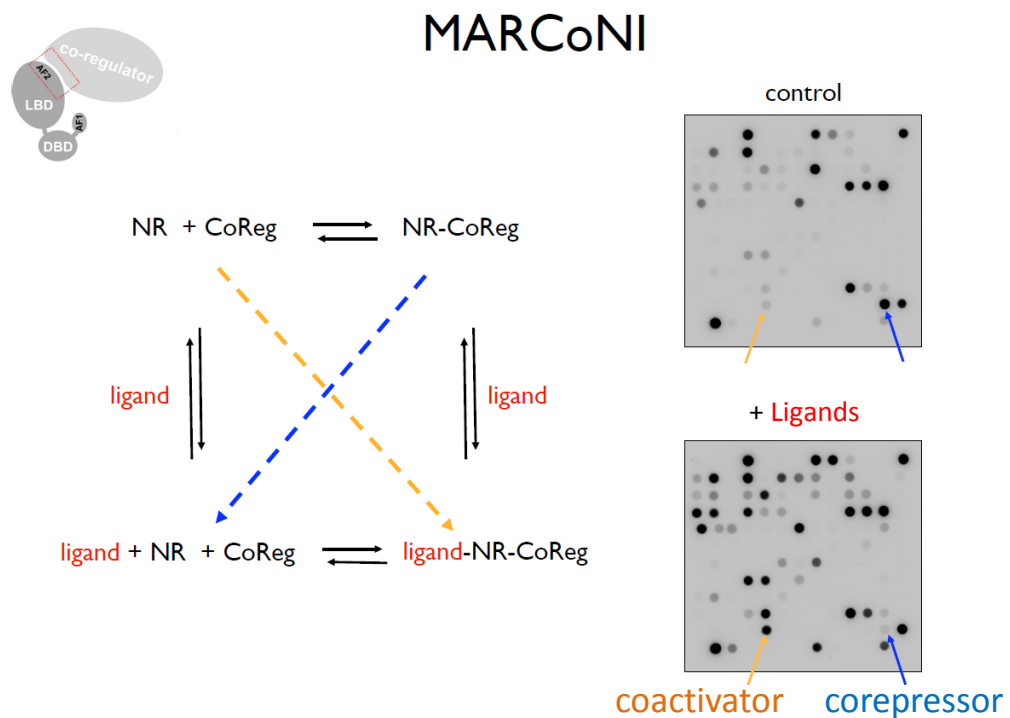

Figure S1. Working model of the MARCoNI assay for an agonist.

Figure S2

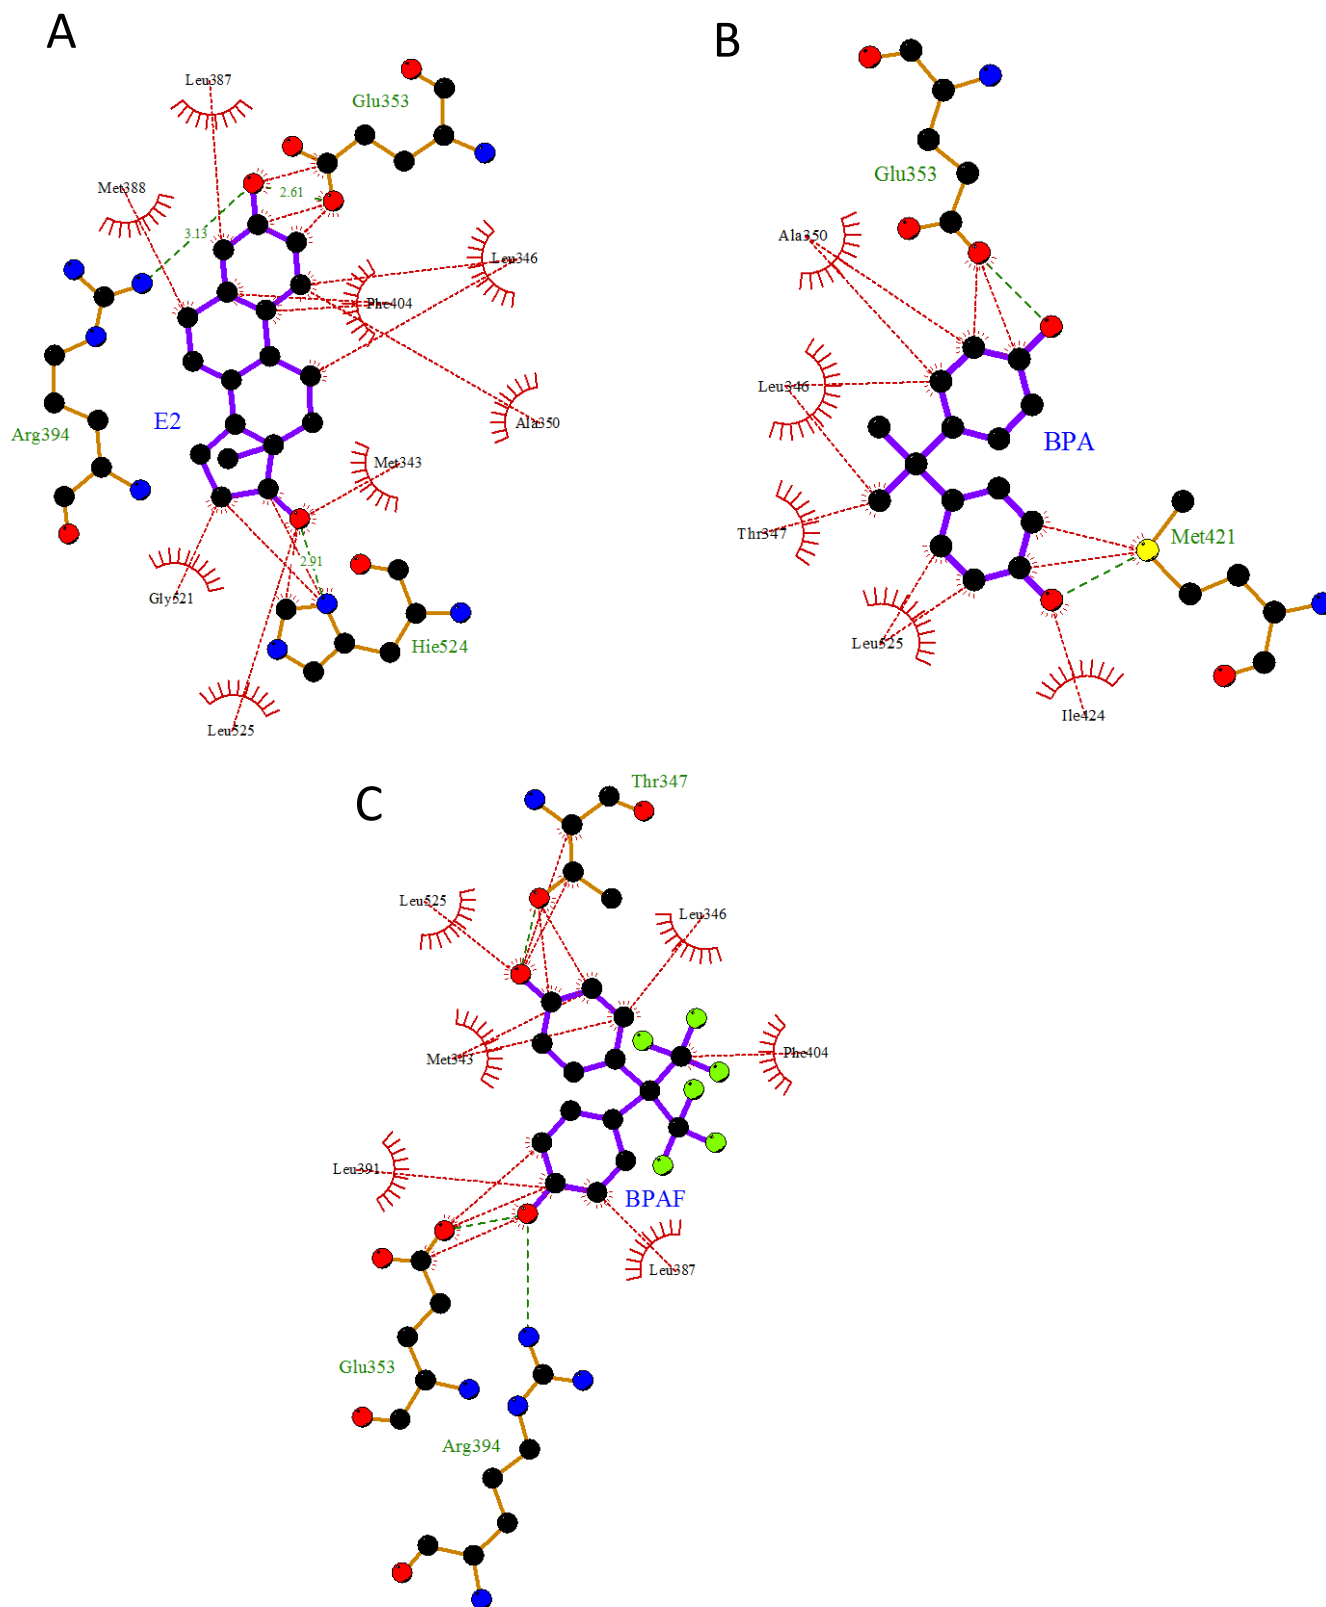



Figure S3

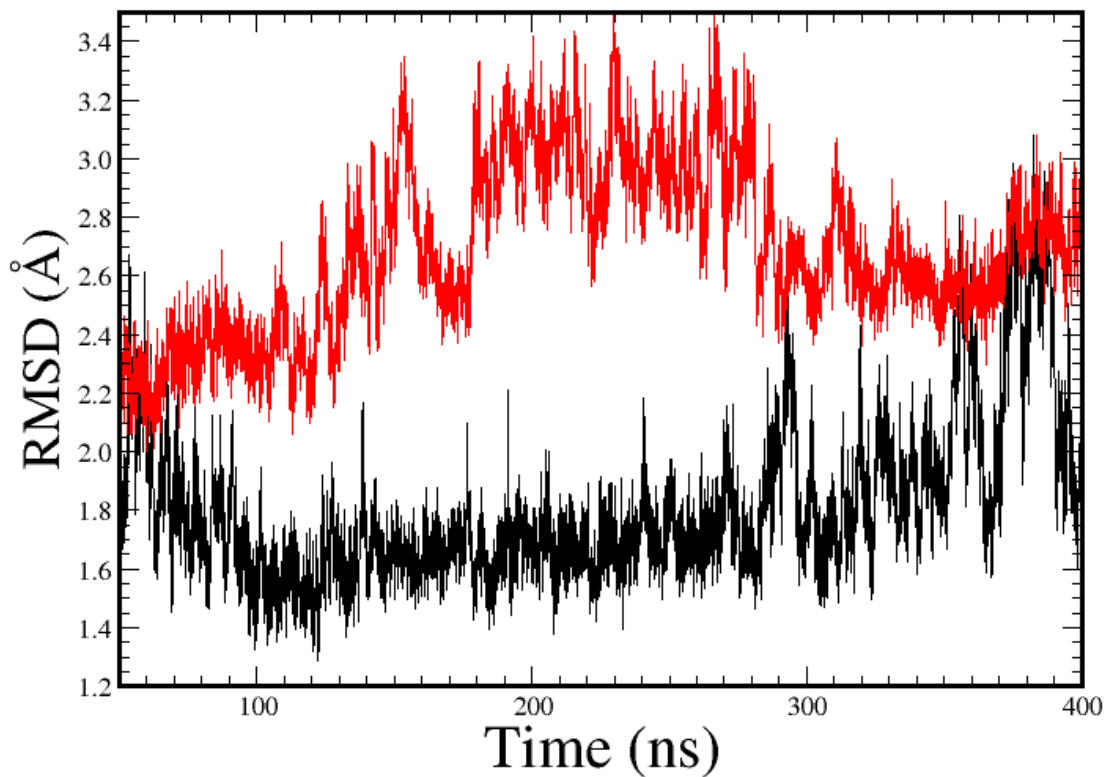

**Figure S3. Root mean square deviation (RMSD) of ligand-free ER structures started at agonist (black) and antagonist (red) forms** The X-ray crystal structures were used as the reference structures for these calculations and all backbone heavy atoms of each residue were used to calculate the average RMSD at each time point.

Figure S4

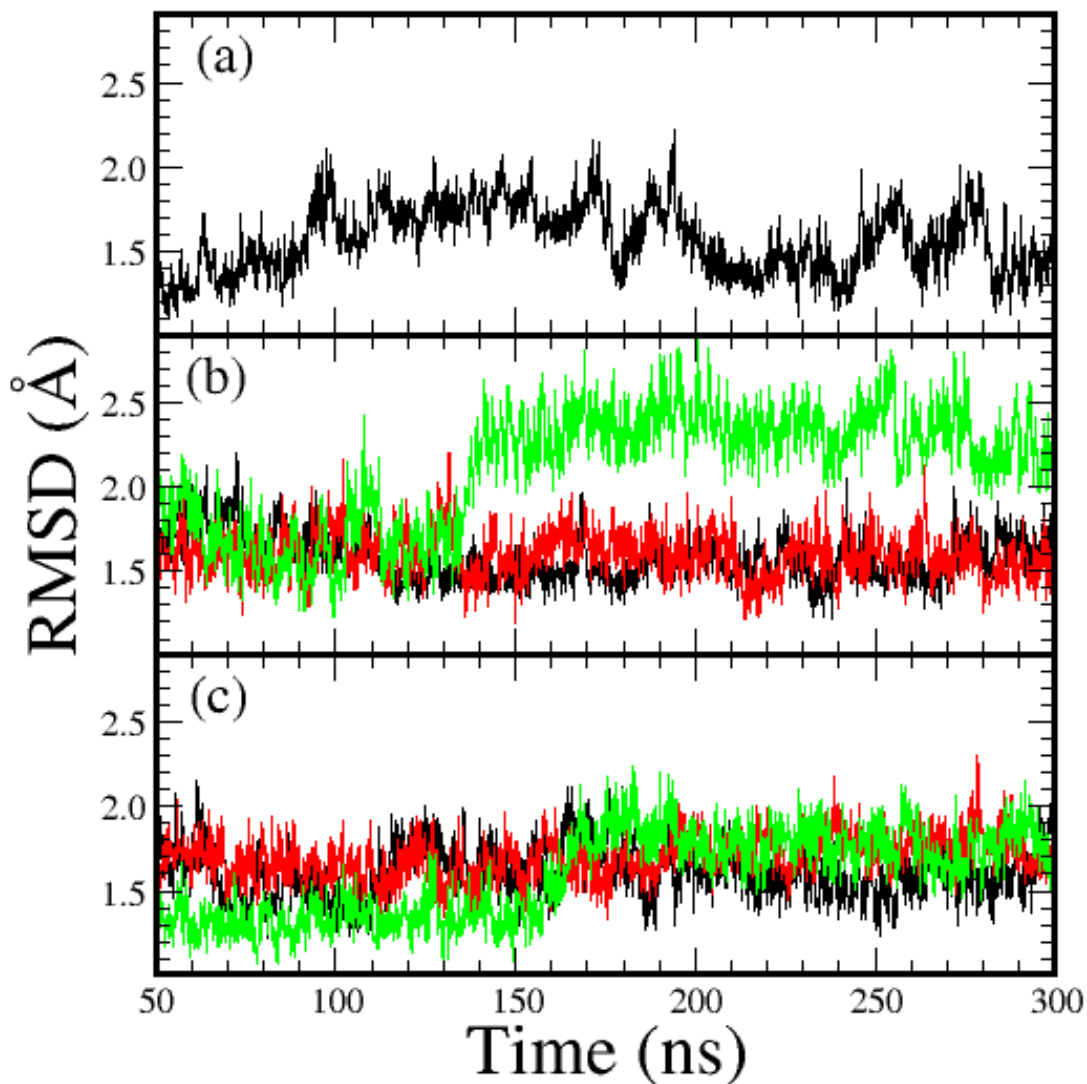

**Figure S4. Root mean square deviation (RMSD) of various ligand bound ER structures in which ligand is at the regular ligand binding site.** The X-ray crystal structures were used as the reference structures for these calculations and all backbone heavy atoms of each residue were used to calculate the average RMSD at each time point.

**Figure S5**

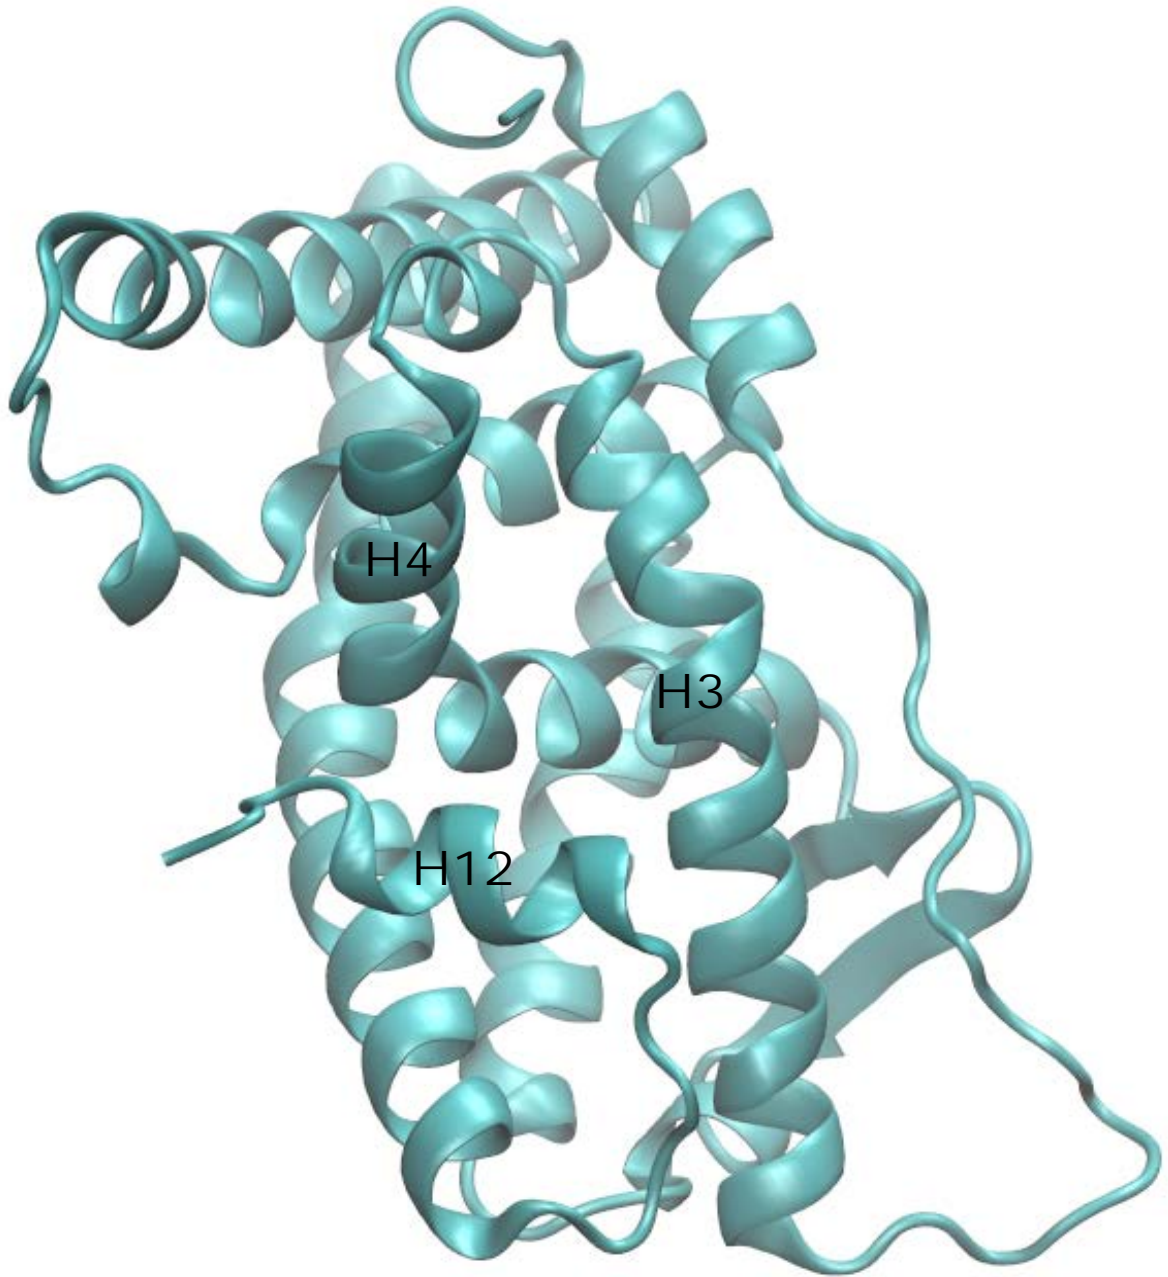

**Figure S5. E2-bound conformation of ERα (in agonist form).**

Figure S6

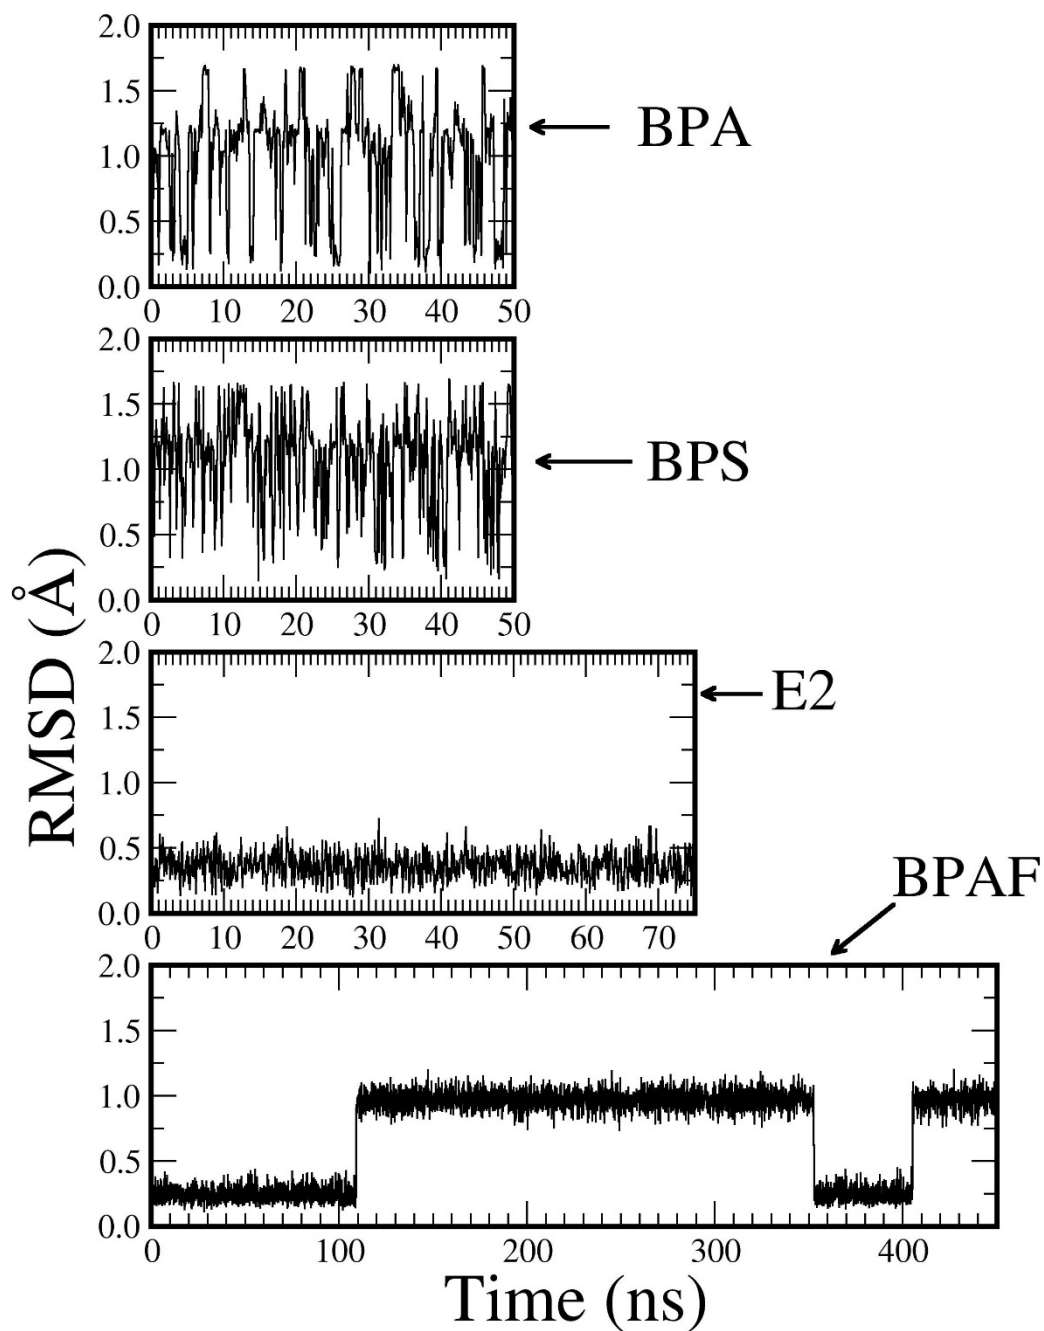

**Figure S6.** Root mean square deviation (RMSD) of the ligands in their aqueous environments. Starting structures were used as the reference structures for these calculations and all heavy atoms were used to calculate the average RMSD at each time point.

**Figure S7**

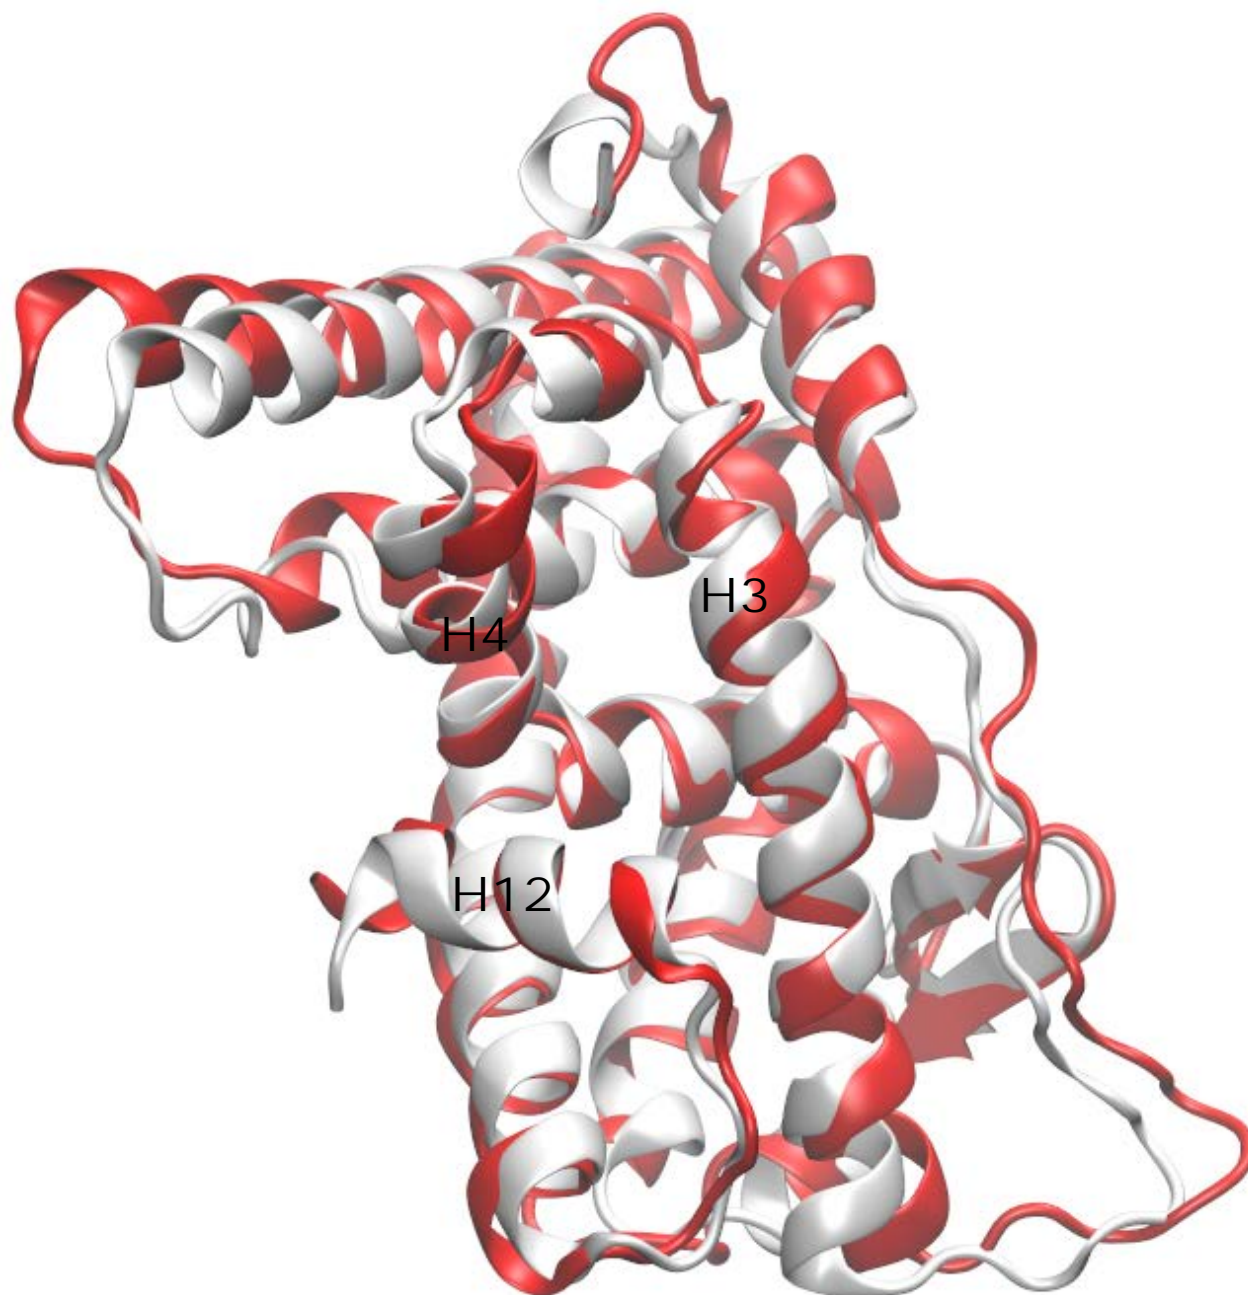

**Figure S7. Ligand free conformation of ER $\alpha$  (starting with aqueous agonist form). Starting conformation is in white and the final conformation is in red.**

**Figure S8**

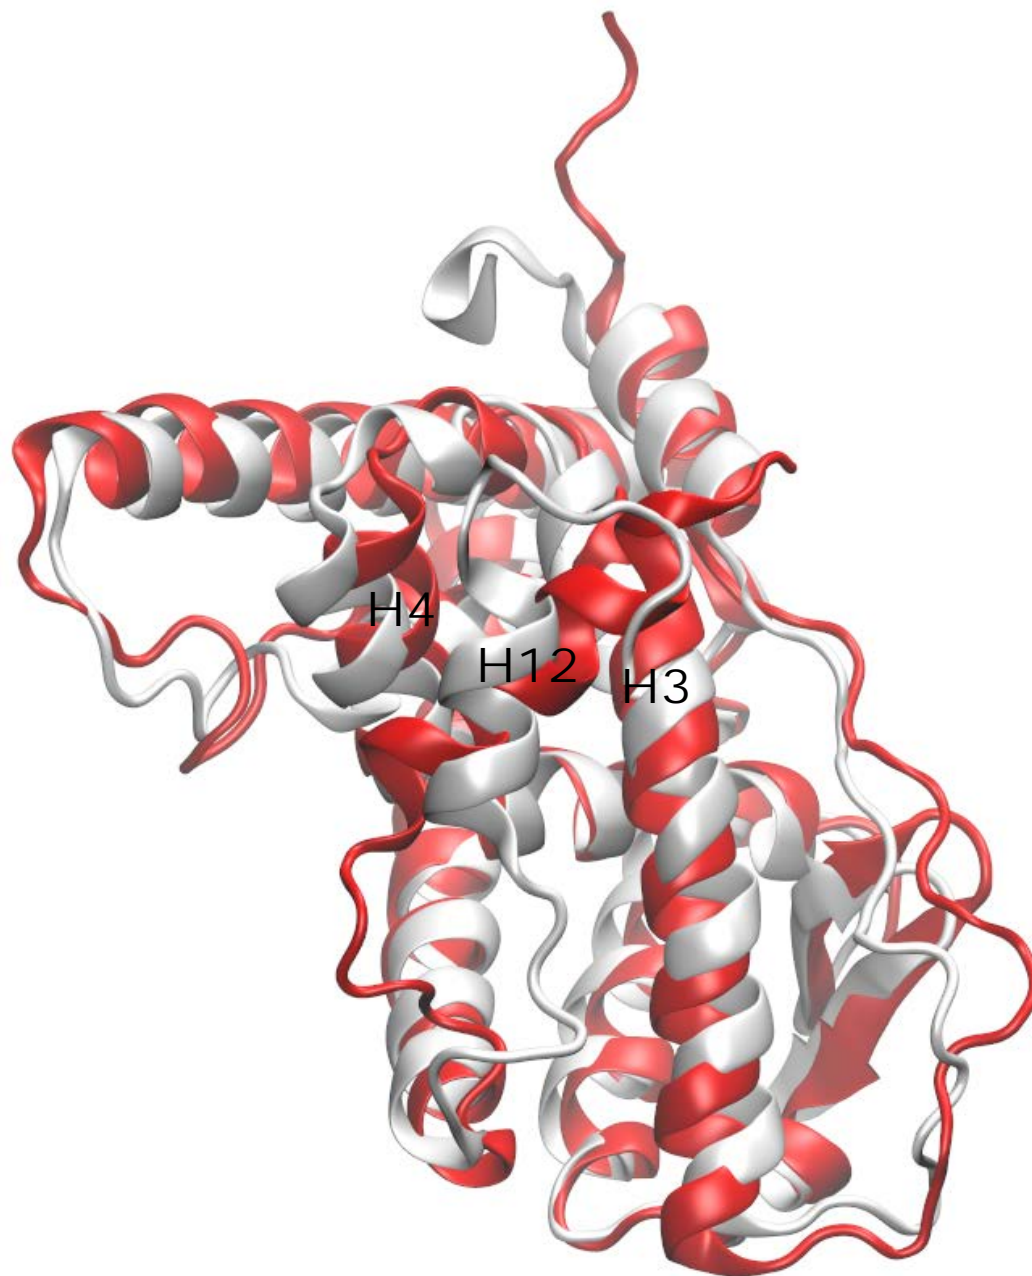

**Figure S8. Ligand free conformation of ER $\alpha$  (starting with antagonist form). Starting conformation is in white and the final conformation is in red.**

Figure S9

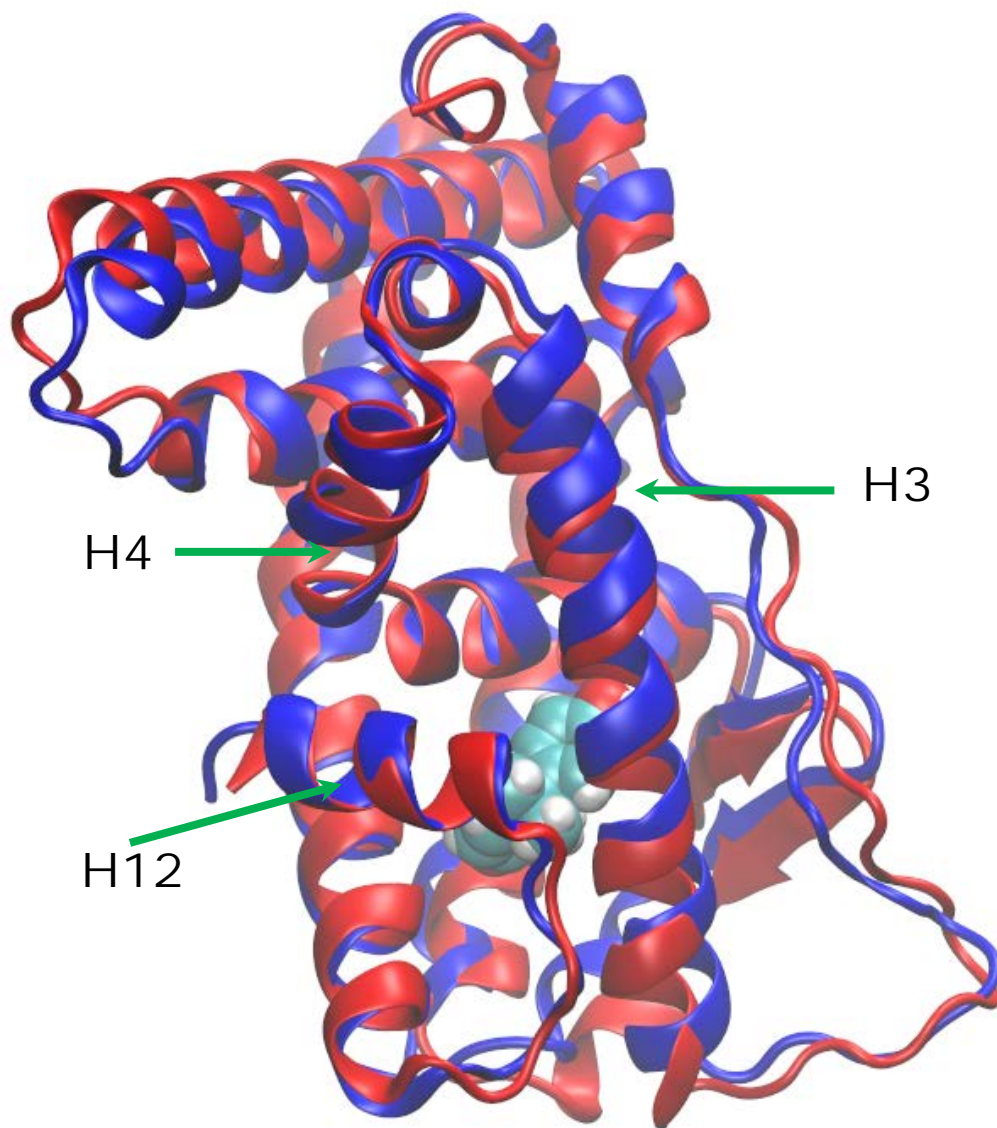

Figure S9 BPA-bound conformations of ER $\alpha$  (Blue-BPA in agonist conformation; Red-BPA in antagonist conformation). BPA is shown in space filling in the ligand binding site of ER $\alpha$ .

Figure S10

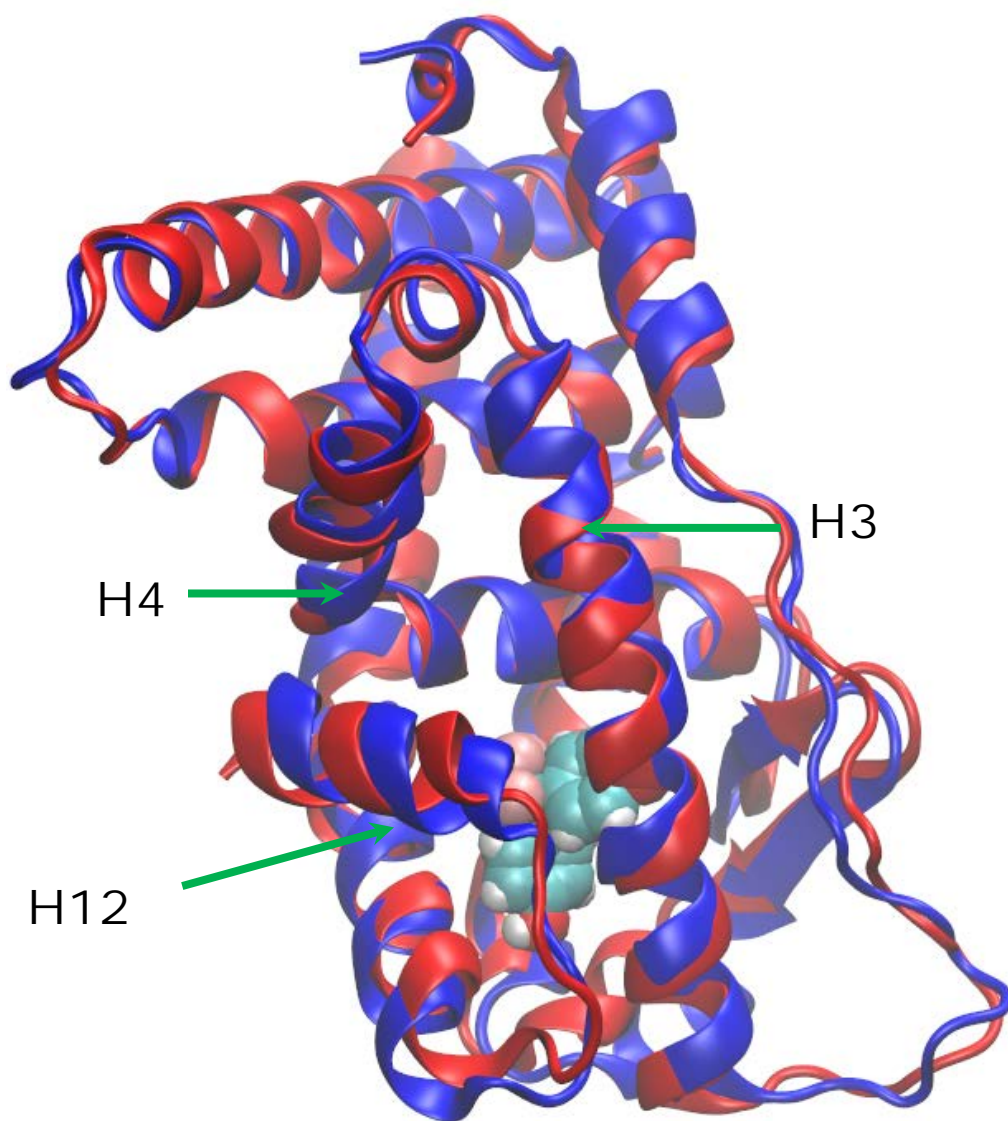

Figure S10 BPAF-bound conformations of ER $\alpha$  (Blue-BPAF in agonist conformation; Red-BPAF in antagonist conformation). BPA is shown in space filling in the ligand binding site of ER $\alpha$ .



Figure S11

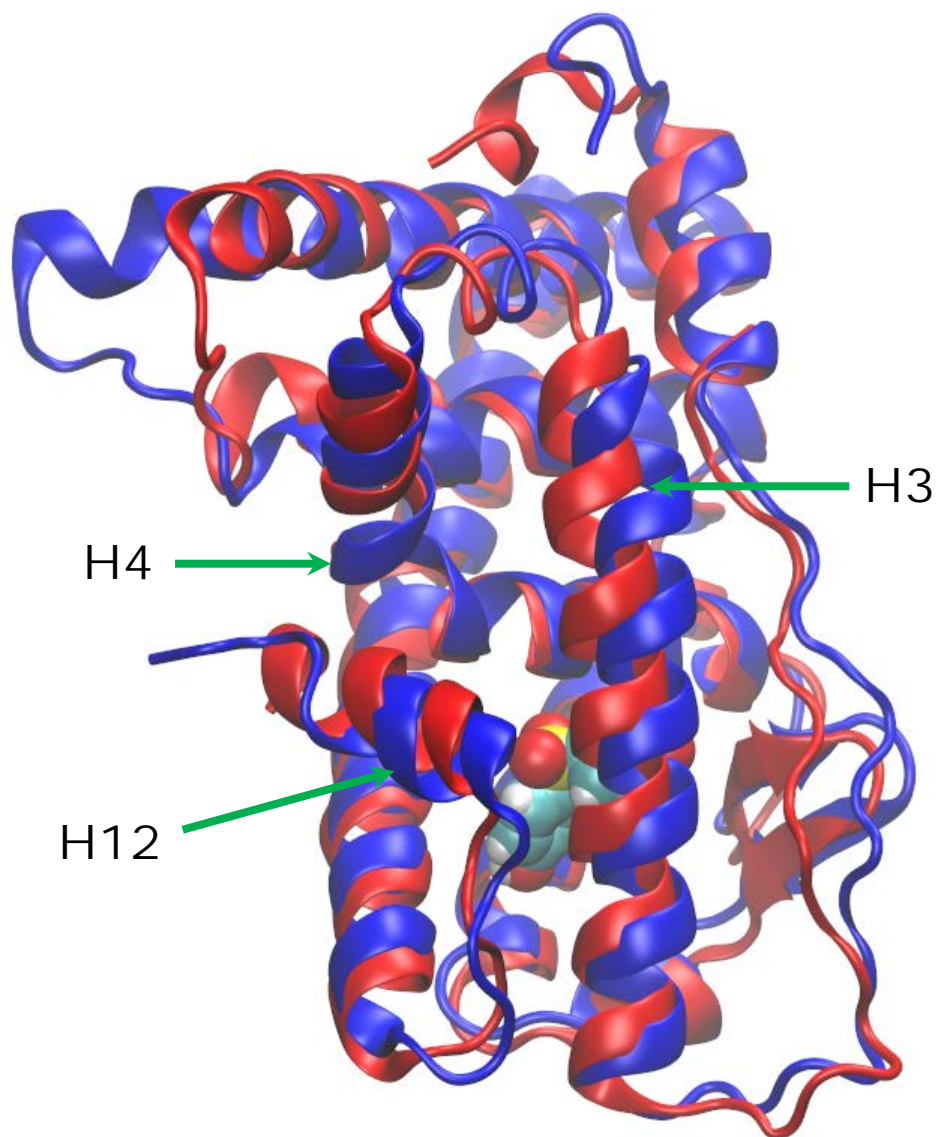

Figure S11 BPS-bound conformations of ER $\alpha$  (Blue-BPS in agonist conformation; Red-BPS in antagonist conformation). BPA is shown in space filling in the ligand binding site of ER $\alpha$ .

Figure S12

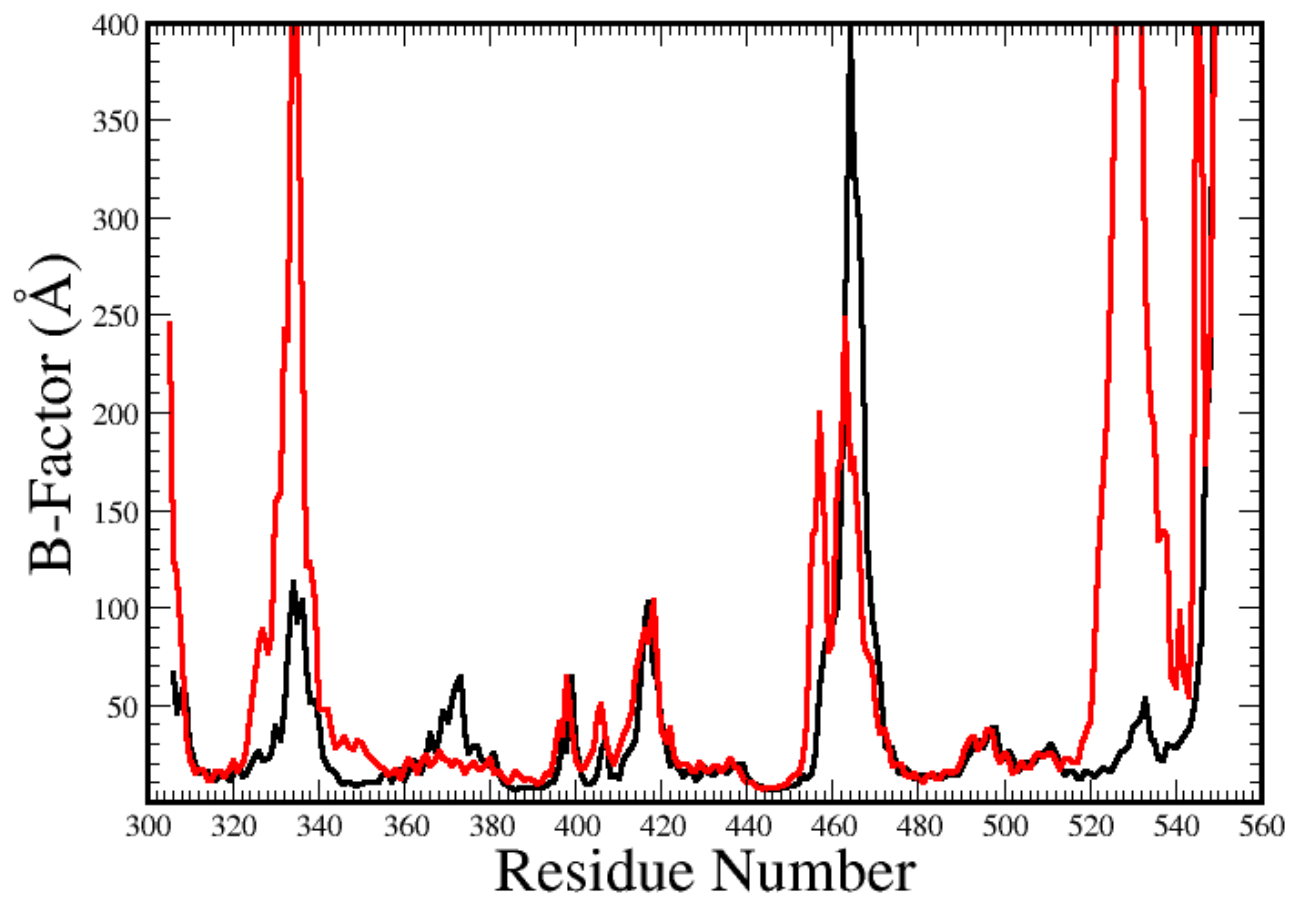

Figure S12 B-factors of backbone atoms of the ligand-free conformations of ER $\alpha$  (Black-in agonist conformation; Red-in antagonist conformation)

Figure S13

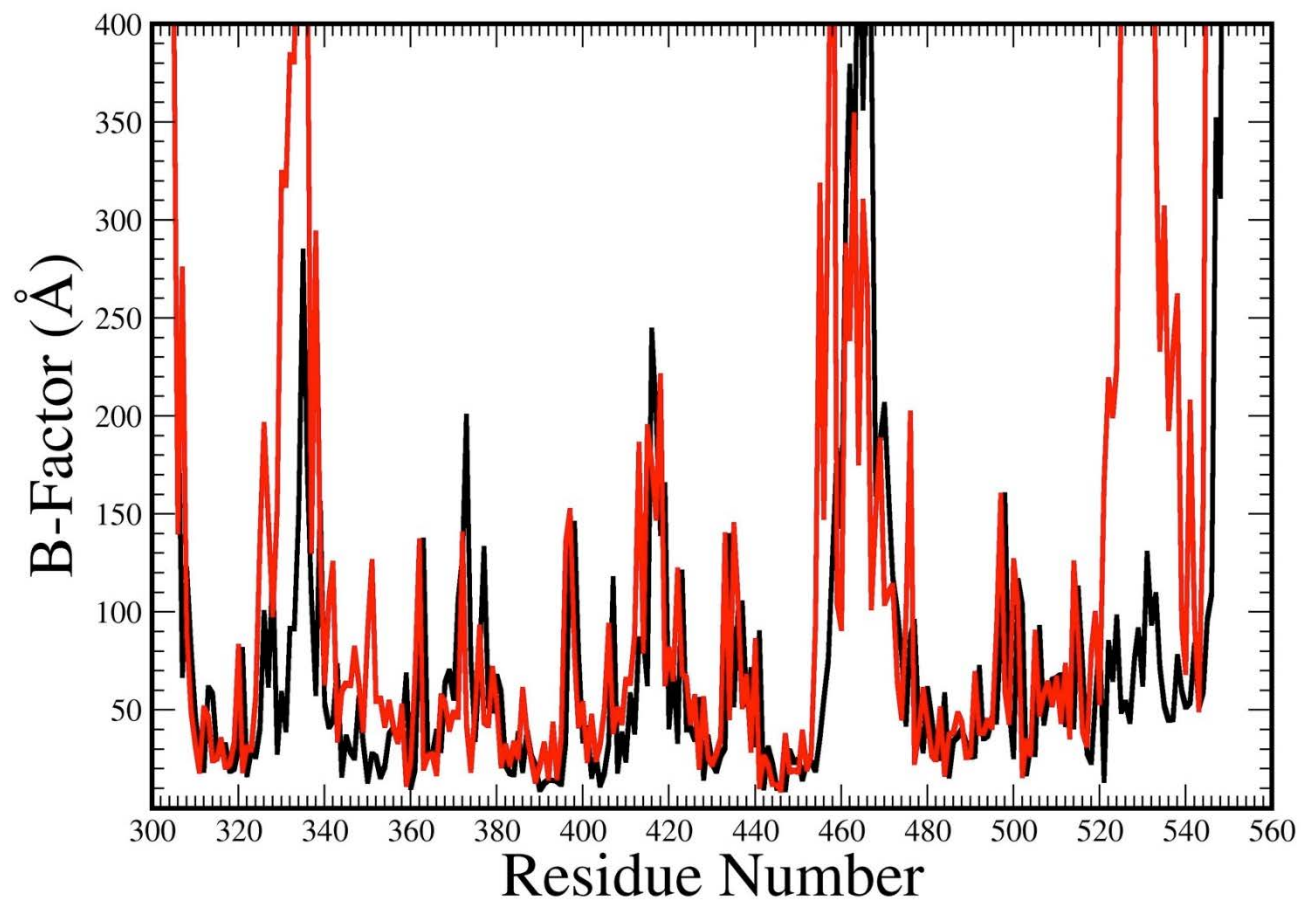

Figure S13 B-factors of side chain atoms of the ligand-free conformations of ER $\alpha$  (Black-in agonist conformation; Red-in antagonist conformation)

Figure S14

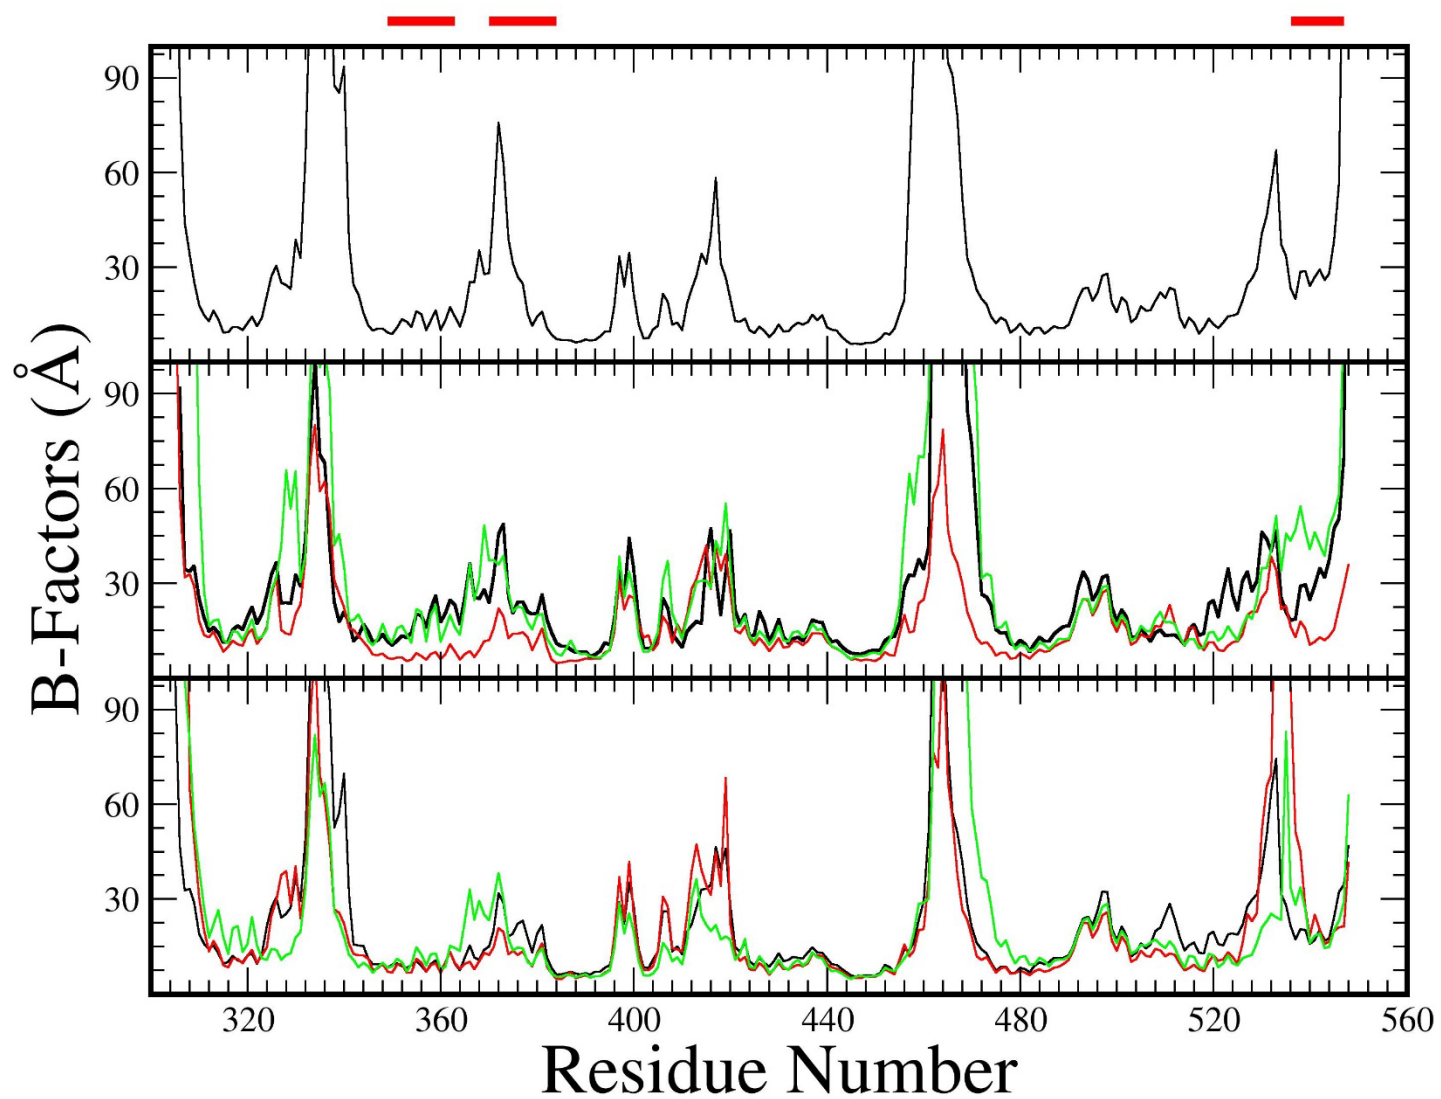

Figure S14 B-factors of backbone atoms of the ligand-bound conformations of ER $\alpha$  (Black-in agonist conformation; Red-in antagonist conformation)

Figure S15

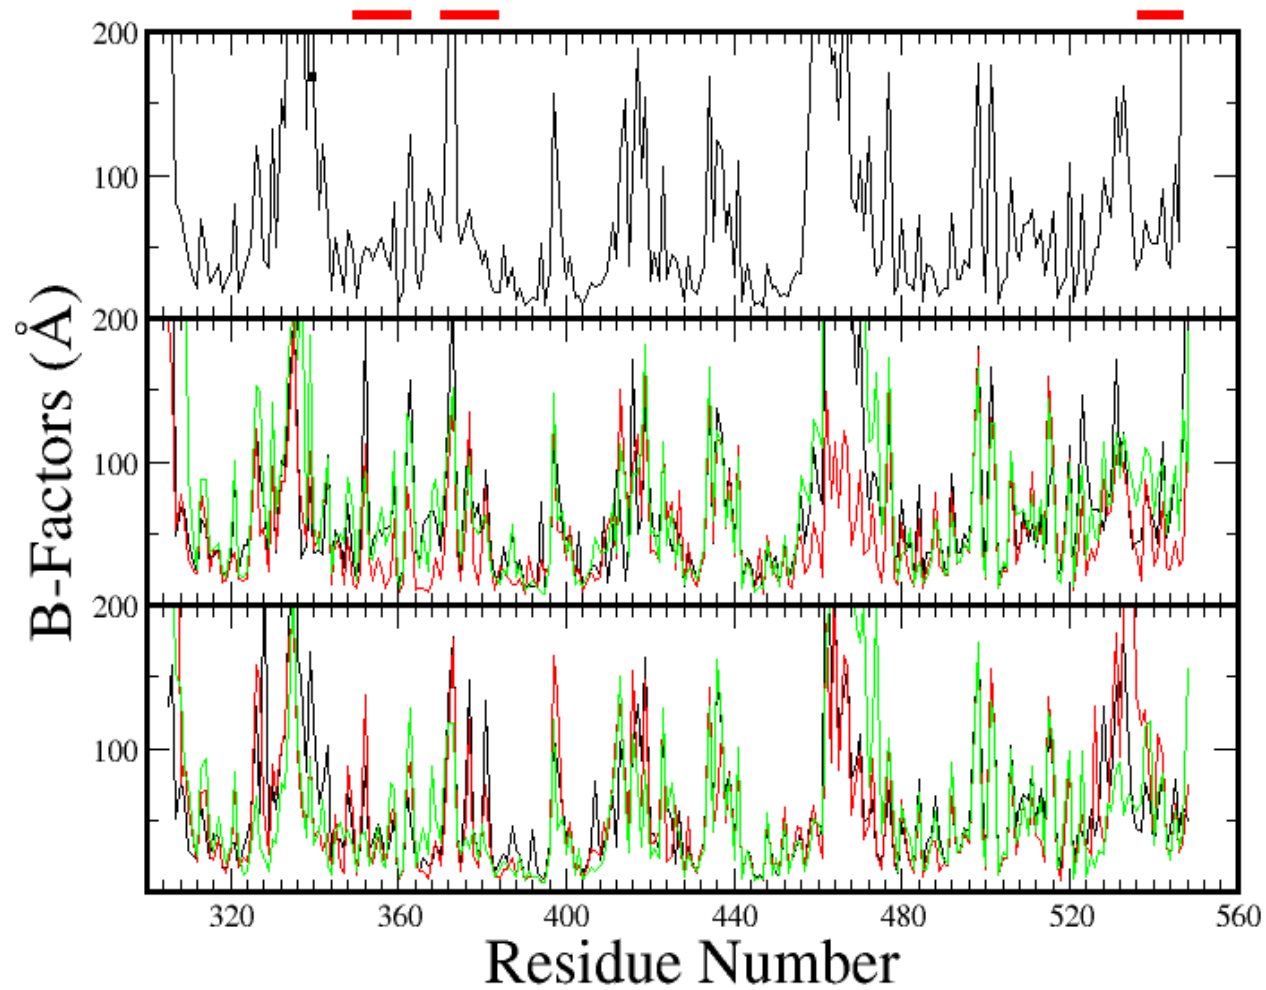

Figure S15 B-factors of side chain atoms of the ligand-bound conformations of ER $\alpha$ .
